# Supplementary material
Source: ML conference proceedings conference paper supplement (https://proceedings.neurips.cc/paper_files/paper/2013/hash/cbb6a3b884f4f88b3a8e3d44c636cbd8-Abstract.html)
Supplement: Supplementary file [file cbb6a3b884f4f88b3a8e3d44c636cbd8-Supplemental.zip]

---

# On Flat versus Hierarchical Classification in Large-Scale Taxonomies

---

**Rohit Babbar, Ioannis Partalas, Eric Gaussier, Massih-Reza Amini**  
 Université Joseph Fourier, Laboratoire Informatique de Grenoble  
 BP 53 - F-38041 Grenoble Cedex 9  
 firstname.lastname@imag.fr

## Appendix: Proof of Theorem 1

Let us first recall Theorem 1:

**Theorem 1** *Let  $\mathcal{S} = ((\mathbf{x}^{(i)}, y^{(i)}))_{i=1}^m$  be a dataset of  $m$  examples drawn i.i.d. according to a probability distribution  $\mathcal{D}$  over  $\mathcal{X} \times \mathcal{Y}$ , and let  $\mathcal{A}$  be a Lipschitz function with constant  $L$  dominating the 0/1 loss; further let  $K : \mathcal{X} \times \mathcal{X} \rightarrow \mathbb{R}$  be a PDS kernel and let  $\Phi : \mathcal{X} \rightarrow \mathbb{H}$  be the associated feature mapping function. Assume that there exists  $R > 0$  such that  $K(\mathbf{x}, \mathbf{x}) \leq R^2$  for all  $\mathbf{x} \in \mathcal{X}$ . Then, for all  $1 < \delta < 0$ , with probability at least  $(1 - \delta)$  the following hierarchical multiclass classification generalization bound holds for all  $g_f \in \mathcal{G}_{\mathcal{F}_B}$ :*

$$\mathcal{E}(g_f) \leq \frac{1}{m} \sum_{i=1}^m \mathcal{A}(g_f(\mathbf{x}^{(i)}, y^{(i)})) + \frac{8BRL}{\sqrt{m}} \sum_{v \in V \setminus \mathcal{Y}} |\mathcal{D}(v)| (|\mathcal{D}(v)| - 1) + 3\sqrt{\frac{\ln(2/\delta)}{2m}} \quad (1)$$

where,  $\mathcal{G}_{\mathcal{F}_B} = \{(\mathbf{x}, y) \in \mathcal{X} \times \mathcal{Y} \mapsto \min_{v \in \mathfrak{P}(y)} (f(\mathbf{x}, v) - \max_{v' \in \mathfrak{S}(v)} f(\mathbf{x}, v')) \mid f \in \mathcal{F}_B\}$ ,  $\mathcal{F}_B = \{(\mathbf{x}, v) \in \mathcal{X} \times V \mapsto \langle \mathbf{w}_v, \mathbf{x} \rangle \mid \mathbf{W} = (w_1 \dots, w_{|V|}), \|\mathbf{W}\|_{\mathbb{H}} \leq B\}$ , and  $|\mathcal{D}(v)|$  denotes the number of daughters of node  $v$ .

**Proof** Exploiting the fact that  $\mathcal{A}$  dominates the 0/1 loss and using the Rademacher data-dependent generalization bound presented in Theorem 4.9 of [2], one has:

$$\begin{aligned} \mathbb{E}_{(x,y) \sim \mathcal{D}} [\mathbf{1}_{g_f(\mathbf{x}, y) \leq 0} - 1] &\leq \mathbb{E}_{(\mathbf{x}, y) \sim \mathcal{D}} [\mathcal{A} \circ g_f(\mathbf{x}, y) - 1] \\ &\leq \frac{1}{m} \sum_{i=1}^m (\mathcal{A}(g_f(\mathbf{x}^{(i)}, y^{(i)})) - 1) + \hat{\mathcal{R}}_m((\mathcal{A} - 1) \circ \mathcal{G}_{\mathcal{F}_B}, \mathcal{S}) + 3\sqrt{\frac{\ln(2/\delta)}{2m}} \end{aligned}$$

where  $\hat{\mathcal{R}}_m$  denotes the empirical Rademacher complexity of  $(\mathcal{A} - 1) \circ \mathcal{G}_{\mathcal{F}_B}$  on  $\mathcal{S}$ . As  $x \mapsto \mathcal{A}(x)$  is a Lipschitz function with constant  $L$  and  $(\mathcal{A} - 1)(0) = 0$ , we further have:

$$\hat{\mathcal{R}}_m((\mathcal{A} - 1) \circ \mathcal{G}_{\mathcal{F}_B}, \mathcal{S}) \leq 2L\hat{\mathcal{R}}_m(\mathcal{G}_{\mathcal{F}_B}, \mathcal{S})$$

with:

$$\begin{aligned} \hat{\mathcal{R}}_m(\mathcal{G}_{\mathcal{F}_B}, \mathcal{S}) &= \mathbb{E}_{\sigma} \left[ \sup_{g_f \in \mathcal{G}_{\mathcal{F}_B}} \left| \frac{2}{m} \sum_{i=1}^m \sigma_i g_f(\mathbf{x}^{(i)}, y^{(i)}) \right| \right] \\ &= \mathbb{E}_{\sigma} \left[ \sup_{f \in \mathcal{F}_B} \left| \frac{2}{m} \sum_{i=1}^m \sigma_i \min_{v \in \mathfrak{P}(y^{(i)})} (f(\mathbf{x}^{(i)}, v) - \max_{v' \in \mathfrak{S}(v)} f(\mathbf{x}^{(i)}, v')) \right| \right] \end{aligned}$$

Let us define the mapping  $c$  from  $\mathcal{F}_B \times \mathcal{X} \times \mathcal{Y}$  into  $V \times V$  as:

$$\begin{aligned} c(f, \mathbf{x}, y) = (v, v') &\Rightarrow (f(\mathbf{x}, v) = \max_{v'' \in \mathfrak{S}(v)} f(\mathbf{x}, v'')) \\ &\wedge (f(\mathbf{x}, v) - f(\mathbf{x}, v') = \min_{u \in \mathfrak{P}(y)} (f(\mathbf{x}, u) - \max_{u' \in \mathfrak{S}(u)} f(\mathbf{x}, u'))) \end{aligned}$$

This definition is similar to the one given in [1] for flat multiclass classification. Then, by construction of  $c$ :

$$\hat{\mathcal{R}}_m(\mathcal{G}_{\mathcal{F}_B}, \mathcal{S}) \leq \frac{2}{m} \mathbb{E}_\sigma \left[ \sup_{f \in \mathcal{F}_B} \sum_{(v, v') \in V^2, v' \in \mathfrak{S}(v)} \left| \sum_{i: c(f, \mathbf{x}^{(i)}, y^{(i)}) = (v, v')} \sigma_i(f(\mathbf{x}^{(i)}, v) - f(\mathbf{x}^{(i)}, v')) \right| \right]$$

By definition,  $f(\mathbf{x}^{(i)}, v) - f(\mathbf{x}^{(i)}, v') = \langle \mathbf{w}_v - \mathbf{w}_{v'}, \Phi(\mathbf{x}^{(i)}) \rangle$  and using Cauchy-Schwartz inequality:

$$\begin{aligned} \hat{\mathcal{R}}_m(\mathcal{G}_{\mathcal{F}_B}, \mathcal{S}) &\leq \frac{2}{m} \mathbb{E}_\sigma \left[ \sup_{\|\mathbf{w}\|_{\mathbb{H}} \leq B} \sum_{(v, v') \in V^2, v' \in \mathfrak{S}(v)} \left| \langle \mathbf{w}_v - \mathbf{w}_{v'}, \sum_{i: c(f, \mathbf{x}^{(i)}, y^{(i)}) = (v, v')} \sigma_i \Phi(\mathbf{x}^{(i)}) \rangle \right| \right] \\ &\leq \frac{2}{m} \mathbb{E}_\sigma \left[ \sup_{\|\mathbf{w}\|_{\mathbb{H}} \leq B} \sum_{(v, v') \in V^2, v' \in \mathfrak{S}(v)} \|\mathbf{w}_v - \mathbf{w}_{v'}\|_{\mathbb{H}} \left\| \sum_{i: c(f, \mathbf{x}^{(i)}, y^{(i)}) = (v, v')} \sigma_i \Phi(\mathbf{x}^{(i)}) \right\|_{\mathbb{H}} \right] \\ &\leq \frac{4B}{m} \sum_{(v, v') \in V^2, v' \in \mathfrak{S}(v)} \mathbb{E}_\sigma \left[ \left\| \sum_{i: c(f, \mathbf{x}^{(i)}, y^{(i)}) = (v, v')} \sigma_i \Phi(\mathbf{x}^{(i)}) \right\|_{\mathbb{H}} \right] \end{aligned}$$

Using Jensen's inequality, and as,  $\forall i, j \in \{l | c(f, \mathbf{x}^{(l)}, y^{(l)}) = (v, v')\}^2, i \neq j, \mathbb{E}_\sigma [\sigma_i \sigma_j] = 0$ , we get:

$$\begin{aligned} \hat{\mathcal{R}}_m(\mathcal{G}_{\mathcal{F}_B}, \mathcal{S}) &\leq \frac{4B}{m} \sum_{(v, v') \in V^2, v' \in \mathfrak{S}(v)} \left( \mathbb{E}_\sigma \left[ \left\| \sum_{i: c(f, \mathbf{x}^{(i)}, y^{(i)}) = (v, v')} \sigma_i \Phi(\mathbf{x}^{(i)}) \right\|_{\mathbb{H}}^2 \right] \right)^{1/2} \\ &= \frac{4B}{m} \sum_{(v, v') \in V^2, v' \in \mathfrak{S}(v)} \left( \sum_{i: c(f, \mathbf{x}^{(i)}, y^{(i)}) = (v, v')} \|\Phi(\mathbf{x}^{(i)})\|_{\mathbb{H}}^2 \right)^{1/2} \\ &= \frac{4B}{m} \sum_{(v, v') \in V^2, v' \in \mathfrak{S}(v)} \left( \sum_{i: c(f, \mathbf{x}^{(i)}, y^{(i)}) = (v, v')} K(\mathbf{x}^{(i)}, \mathbf{x}^{(i)}) \right)^{1/2} \\ &\leq \frac{4B}{m} \sum_{(v, v') \in V^2, v' \in \mathfrak{S}(v)} (mR^2)^{1/2} \\ &= \frac{4BR}{\sqrt{m}} \sum_{v \in V \setminus \mathcal{Y}} |\mathfrak{D}(v)| (|\mathfrak{D}(v)| - 1) \end{aligned}$$

Plugging this bound into the first inequality yields the desired result.  $\square$

## References

- [1] Y. Guermeur. Sample complexity of classifiers taking values in  $\mathbb{R}^q$ , application to multi-class SVMs. *Communications in Statistics - Theory and Methods*, 39, 2010.
- [2] J. Shawe-Taylor and N. Cristianini. *Kernel Methods for Pattern Analysis*. Cambridge University Press, New York, NY, USA, 2004.
